# Supplementary material
Source: publisher figshare collection journal article supplement (https://acs.figshare.com/ndownloader/files/5176891)
Supplement: Supplementary file 1 [file 5176891]

# Asymmetric Synthesis of Axially Chiral Biaryls by Nickel-Catalyzed Grignard Cross-Coupling of Dibenzothiophenes

Yong-Hwan Cho, Asato Kina, Toyoshi Shimada, and Tamio Hayashi\*

*Department of Chemistry, Graduate School of Science, Kyoto University, Sakyo,*

*Kyoto 606-8502, Japan*

*thayashi@kuchem.kyoto-u.ac.jp*

## Supporting Information

Experimental procedures for the determination of absolute configurations of the compounds **9am**, **9an**, and **19**. S2-S5

**Figure 1.** Variable-temperature  $^{31}\text{P}$  NMR spectra of **21**. S6

**Determination of Absolute Configuration of 2,2'-Bis(4-methylphenyl)-6,6'-dimethyl-1,1'-biphenyl (9am).**

**(a) Preparation of an Authentic Sample, (S)-(+)-9am:** The starting material, (S)-2,2'-bis(trifluoromethanesulfonyloxy)-6,6'-dimethyl-1,1'-biphenyl was prepared by the triflation of (S)-2,2'-dihydroxy-6,6'-dimethyl-1,1'-biphenyl<sup>1</sup> with triflic anhydride and pyridine in 1,2-dichloroethane (96% yield). To a solution of the bis(triflate) (0.60 g, 1.2 mmol) and PdCl<sub>2</sub>(dppf) (0.3 g, 0.3 mmol) in dry THF (50 mL) was slowly added 4-methylphenylzinc chloride solution which is a white slurry prepared from 4-methylphenylmagnesium bromide and ZnCl<sub>2</sub> in THF (6.1 mL, 8.1 mmol) at 0 °C. The mixture was refluxed for 48 h. When the reaction was confirmed to be completed by a TLC analysis, the mixture was quenched with water at 0 °C. It was diluted with diethyl ether and the organic layer was washed with 10% HCl and brine. The organic layer was dried over anhydrous MgSO<sub>4</sub> and evaporated under reduced pressure. Silica gel column chromatography (hexane/ethyl acetate = 98/2) gave 0.30 g (72% yield) of (S)-2,2'-bis(4-methylphenyl)-6,6'-dimethyl-1,1'-biphenyl (**9am**): [ $\alpha$ ]<sub>D</sub><sup>20</sup> +75 (*c* 1.0, chloroform) for **9am** of 97% ee; <sup>1</sup>H NMR (CDCl<sub>3</sub>)  $\delta$  2.04 (s, 6H), 2.23 (s, 6H), 6.62 (d, *J* = 8.0 Hz, 4H), 6.83 (d, *J* = 8.0 Hz, 4H), 7.06 (d, *J* = 7.6 Hz, 2H), 7.13 (d, *J* = 7.6 Hz, 2H), 7.19 (t, *J* = 7.6 Hz, 2H); <sup>13</sup>C NMR (CDCl<sub>3</sub>)  $\delta$  20.5, 21.0, 127.1, 127.8, 127.9, 128.6, 129.0, 135.5, 136.8, 138.2, 138.7, 141.1; Anal. Calcd for C<sub>28</sub>H<sub>26</sub>: C, 92.77; H, 7.23. Found: C, 92.47; H, 7.35.

**(b) Cross-Coupling of 8am with 4-Methylphenylmagnesium Bromide in the Presence of Ni(acac)<sub>2</sub>:** To a solution of (S)-**8am** (81% ee, 100 mg, 0.33 mmol) and Ni(acac)<sub>2</sub> (25 mg, 0.10 mmol) in dry benzene (6 mL) was added 4-methylphenylmagnesium bromide in Et<sub>2</sub>O (2.6 mL, 3.3 mmol) at 0 °C. The reaction mixture was allowed to stir at 80 °C for 12 h and quenched with H<sub>2</sub>O. It was diluted with CHCl<sub>3</sub> and the organic layer was washed with 10% HCl, saturated aqueous NaHCO<sub>3</sub>, and aqueous sodium chloride. The organic layer was dried over anhydrous MgSO<sub>4</sub> and evaporated under reduced pressure. Silica gel preparative thin layer chromatography (hexane/ethyl acetate = 98/2) gave 86 mg (72% yield, 81% ee) of (S)-

2,2'-bis(4-methylphenyl)-6,6'-dimethyl-1,1'-biphenyl (**9am**):  $[\alpha]^{20}_{\text{D}} +43$  (*c* 1.0, chloroform) for **8am** of 74% ee.

**Determination of Absolute Configuration of 2,2'-Diphenyl-6,6'-dimethyl-1,1'-biphenyl (**9an**).**

(a) **Preparation of an Authentic Sample, (*S*)-(+)-**9an**:** (*S*)-2,2'-Diphenyl-6,6'-dimethyl-1,1'-biphenyl (**9an**) was prepared from (*S*)-2,2'-dihydroxy-6,6'-dimethyl-1,1'-biphenyl<sup>1</sup> in a similar manner to the preparation of (*S*)-2,2'-bis(4-methylphenyl)-6,6'-dimethyl-1,1'-biphenyl (**9am**).  $[\alpha]^{20}_{\text{D}} +15$  (*c* 0.8, chloroform) for **9an** of 97% ee; <sup>1</sup>H NMR (CDCl<sub>3</sub>)  $\delta$  2.12 (s, 6H), 6.63 (d, *J* = 7.4 Hz, 4H), 7.00 (t, *J* = 7.5 Hz, 4H), 7.04 (d, *J* = 7.4 Hz, 2H), 7.07 (t, *J* = 7.5 Hz, 2H), 7.19 (d, *J* = 7.4 Hz, 2H), 7.22 (t, *J* = 7.5 Hz, 2H); <sup>13</sup>C NMR (CDCl<sub>3</sub>)  $\delta$  20.4, 125.9, 127.0, 127.2, 127.8, 128.7, 129.1, 137.0, 138.0, 141.1, 141.5; Anal. Calcd for C<sub>26</sub>H<sub>22</sub>: C, 93.37; H, 6.63. Found: C, 93.07; H, 6.72.

(b) **Cross-Coupling of **8an** with Phenylmagnesium Bromide in the Presence of Ni(acac)<sub>2</sub>:** To a solution of (*S*)-**8an** (81% ee, 12 mg, 0.04 mmol) and Ni(acac)<sub>2</sub> (3.2 mg, 0.01 mmol) in dry benzene (2 mL) was added phenylmagnesium bromide in THF (0.50 mL, 0.41 mmol) at 0 °C. The reaction mixture was allowed to stir at 80 °C for 12 h and quenched with H<sub>2</sub>O at 0 °C. It was diluted with CHCl<sub>3</sub> and the organic layer was washed with 10% HCl, saturated NaHCO<sub>3</sub>, and brine. The organic layer was dried over anhydrous MgSO<sub>4</sub> and evaporated under reduced pressure. Silica gel preparative thin layer chromatography (hexane/ethyl acetate = 98/2) gave 12 mg (87% yield) of (*S*)-2,2'-diphenyl-6,6'-dimethyl-1,1'-biphenyl (**9an**):  $[\alpha]^{20}_{\text{D}} +13$  (*c* 1.0, chloroform) for **9an** of 81% ee.

(c) **Cross-Coupling of **8cq** with Methylmagnesium Iodide in the Presence of Ni(acac)<sub>2</sub>:** To a solution of (*S*)-**8cq** (53% ee, 55 mg, 0.16 mmol) and Ni(acac)<sub>2</sub> (12 mg, 0.05 mmol) in dry benzene (4 mL) was added methylmagnesium iodide in Et<sub>2</sub>O (0.70 mL, 1.3 mmol) at 0 °C. The reaction mixture was allowed to stir at 80 °C for 12 h and quenched with H<sub>2</sub>O. It was diluted with CHCl<sub>3</sub> and the organic layer was washed with 10% HCl, saturated NaHCO<sub>3</sub>, and brine. The organic layer

was dried over anhydrous  $\text{MgSO}_4$  and evaporated under reduced pressure. Silica gel preparative thin layer chromatography (hexane/ethyl acetate = 98/2) gave 32 mg (61% yield) of (*R*)-2,2'-diphenyl-6,6'-dimethyl-1,1'-biphenyl (**9an**):  $[\alpha]^{20}_{\text{D}} -8$  (*c* 1.0, chloroform) for **9an** of 53% ee.

**Determination of Absolute Configuration of 2-(4-Methylphenyl)-1,1'-binaphthyl (19).**

**(a) Preparation of an Authentic Sample, (*S*)-(+)-19, from (*S*)-2-Trifluoromethanesulfonyloxy-1,1'-binaphthyl:** The starting material, (*S*)-2-trifluoromethanesulfonyloxy-1,1'-binaphthyl was prepared from (*R*)-binaphthol according to the reported procedures.<sup>2</sup> To a solution of the triflate (0.41 g, 1.0 mmol) and  $\text{NiCl}_2(\text{dppe})^3$  (54 mg, 0.10 mmol) in dry THF (20 mL) was slowly added 4-methylphenylmagnesium bromide in THF (3.1 mL, 5.1 mmol) at 0 °C. The mixture was allowed to stir at 65 °C for 12 h, and quenched with  $\text{H}_2\text{O}$  at 0 °C. It was diluted with ether and the organic layer was washed with 10% HCl, saturated  $\text{NaHCO}_3$  solution, and brine. The organic layer was dried over anhydrous  $\text{MgSO}_4$  and evaporated under reduced pressure. Silica gel column chromatography (hexane/ethyl acetate = 98/2) gave 0.16 mg (45% yield) of (*S*)-2-(4-methylphenyl)-1,1'-binaphthyl (**19**).<sup>4</sup>  $[\alpha]^{20}_{\text{D}} +96$  (*c* 0.4, chloroform) for **19** of >99% ee;  $^1\text{H}$  NMR ( $\text{CDCl}_3$ )  $\delta$  2.17 (s, 3H), 6.82 (d, *J* = 8.1 Hz, 2H), 6.96 (d, *J* = 8.1 Hz, 2H), 7.20 (d, *J* = 8.5 Hz, 1H), 7.25 (m, 3H), 7.36 (d, *J* = 8.1 Hz, 1H), 7.39 (t, *J* = 8.5 Hz, 1H), 7.41 (d, *J* = 8.1 Hz, 1H), 7.44 (ddd, *J* = 8.1, 6.6, 1.5 Hz, 1H), 7.64 (d, *J* = 8.5 Hz, 1H), 7.80 (d, *J* = 8.2 Hz, 1H), 7.86 (d, *J* = 8.2 Hz, 1H), 7.93 (d, *J* = 8.2 Hz, 1H), 7.99 (d, *J* = 8.5 Hz, 1H).

**(b) Cross-Coupling of 10 with 4-Methylphenylmagnesium Bromide in the Presence of  $\text{Ni}(\text{acac})_2$ :** To a solution of (*S*)-2-mercapto-1,1'-binaphthyl (**10**) (43% ee, 21 mg, 0.07 mmol) and  $\text{Ni}(\text{acac})_2$  (2.0 mg, 0.01 mmol) in dry benzene (3.0 mL) was added 4-methylphenylmagnesium bromide in THF (0.5 mL, 0.73 mmol) at 0 °C. The reaction mixture was allowed to stir at 80 °C for 10 h and quenched with  $\text{H}_2\text{O}$ . It was diluted with  $\text{CHCl}_3$  and the organic layer was washed with

10% HCl, saturated NaHCO<sub>3</sub> solution, and brine. The organic layer was dried over anhydrous MgSO<sub>4</sub> and evaporated under reduced pressure. Silica gel preparative thin layer chromatography (hexane/ethyl acetate = 98/2) gave 19 mg (75% yield, 44% ee) of (*S*)-2-(4-methylphenyl)-1,1'-binaphthyl (**19**): [ $\alpha$ ]<sub>D</sub><sup>20</sup> +65 (*c* 0.5, chloroform) for **19** of 44% ee.

**(c) Preparation from (*S*)-2-Mercapto-2'-(4-methylphenyl)-1,1'-binaphthyl (8dm):** To a solution of (*S*)-2-methylsufinyl-2'-(4-methylphenyl)-1,1'-binaphthyl (0.12 g, 0.30 mmol), obtained by methylation of the mercapto group in (*S*)-2-mercapto-2'-(4-methylphenyl)-1,1'-binaphthyl (**8dm**) followed by oxidation of the sulfide with *m*CPBA according to the procedures described for the preparation of **12**, in dry THF (10 mL) was slowly added ethylmagnesium bromide in diethyl ether (1.8 mL, 3.0 mmol) at 0 °C. The resulting mixture was stirred at room temperature for 35 min and quenched with 10% HCl at 0 °C. It was diluted with ether and the organic layer was washed with 10% HCl and saturated NaHCO<sub>3</sub> solution and brine, was dried over anhydrous MgSO<sub>4</sub>, and evaporated under reduced pressure. The residue was purified by column chromatography on silica gel (hexane/ethyl acetate = 98/2) to give 92 mg (90% yield) of (*R*)-2-(4-methylphenyl)-1,1'-binaphthyl (**19**): [ $\alpha$ ]<sub>D</sub><sup>20</sup> –88 (*c* 0.3, chloroform) for **19** of 95% ee.

## References

- (1) (a) Tuyet, T. M. T.; Harada, T.; Hashimoto, K.; Hatsuda, M.; Oku, A. *J. Org. Chem.* **2000**, *65*, 1335. (b) Harada, T.; Tuyet, T. M. T.; Oku, A. *Org. Lett.* **2000**, *2*, 1319. (c) Harada, T.; Yoshida, T.; Inoue, A.; Takeuchi, M.; Oku, A. *Synlett* **1995**, 283.
- (2) Uozumi, Y.; Suzuki, N.; Ogiwara, A.; Hayashi, T. *Tetrahedron* **1994**, *50*, 4293.
- (3) Hayashi, T.; Han, J.-W.; Takeda, A.; Tang, J.; Nohmi, K.; Mukaide, K.; Tsuji, H.; Uozumi, Y. *Adv. Synth. Catal.* **2001**, *343*, 279.
- (4) Yin, J.; Rainka, M. P.; Zhang, X. -X.; Buchwald, S. L. *J. Am. Chem. Soc.* **2002**, *124*, 1162.

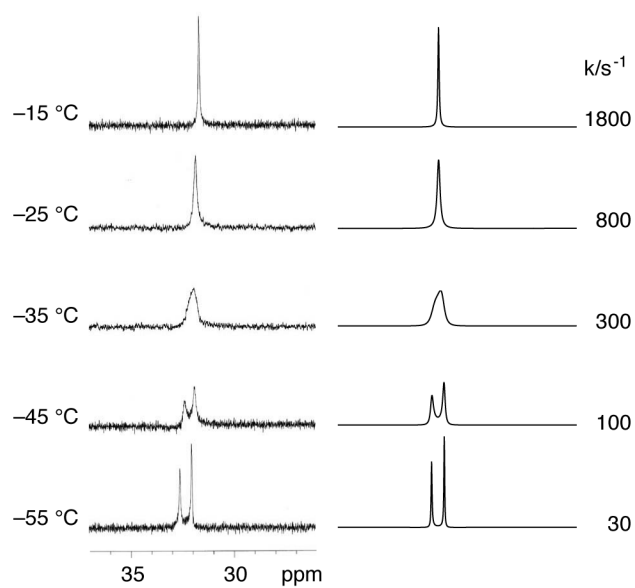

**Figure 1.** Experimental variable-temperature  $^{31}\text{P}$  NMR (202 Hz, left) spectra of **21** in  $\text{CDCl}_3$ , and computer simulation of  $^{31}\text{P}$  NMR spectra with exchange rate constants (right).
